# Supplementary material
Source: PubMed Central journal article supplement (PMC5677763)
Supplement: ja7b05937_si_001.pdf [file ja7b05937_si_001.pdf]

## Supplementary Information for

# Evaluation of $^{64}\text{Cu}$ -based Radiopharmaceuticals that Target A $\beta$ Peptide Aggregates as Diagnostic Tools for Alzheimer's Disease

Nilantha Bandara,<sup>†,§,¶</sup> Anuj K. Sharma,<sup>‡,¶</sup> Stephanie Krieger,<sup>§</sup> Jason W. Schultz,<sup>‡</sup> Byung Hee Han,<sup>‡</sup> Buck E. Rogers,<sup>\*,†,§</sup> and Liviu M. Mirica<sup>\*,‡,∇</sup>

<sup>†</sup>Mallinckrodt Institute of Radiology, Washington University School of Medicine, St. Louis, Missouri 63110, United States

<sup>‡</sup>Department of Chemistry, Washington University, One Brookings drive, St. Louis, Missouri 63130-4899, United States

<sup>§</sup>Department of Radiation Oncology, Washington University School of Medicine, St. Louis, Missouri 63108, United States

<sup>∇</sup>Hope Center for Neurological Disorders, Washington University School of Medicine, St. Louis, MO 63110, United States

<sup>¶</sup>Department of Pharmacology, A.T. Still University of Health Sciences, Kirksville College of Osteopathic Medicine, Kirksville, Missouri 63501, United States

### Table of Contents

|            |                                                                                                                 |            |
|------------|-----------------------------------------------------------------------------------------------------------------|------------|
| <b>I</b>   | <b>Structure of blocking agents employed</b>                                                                    | <b>S2</b>  |
| <b>II</b>  | <b>A<math>\beta</math> fibril binding assays of blocking agents B<sub>1</sub> and B<sub>2</sub></b>             | <b>S3</b>  |
| <b>III</b> | <b>A<math>\beta</math> fibril binding assays of BFCs L<sub>1</sub>-L<sub>5</sub></b>                            | <b>S4</b>  |
| <b>IV</b>  | <b>A<math>\beta</math> fibril binding assays of Cu complexes of BFCs L<sub>1</sub>-L<sub>5</sub></b>            | <b>S6</b>  |
| <b>V</b>   | <b>Fluorescence microscopy images of mouse brain sections stained with BFCs L<sub>4</sub> and L<sub>5</sub></b> | <b>S8</b>  |
| <b>VI</b>  | <b>HPLC traces from <math>^{64}\text{Cu}</math> radiolabeling of BFCs L<sub>0</sub>-L<sub>5</sub></b>           | <b>S9</b>  |
| <b>VII</b> | <b>Fused PET/CT Scans</b>                                                                                       | <b>S11</b> |

## I. Structure of Blocking Agents Employed

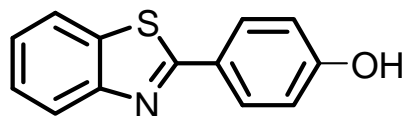

2-(4-hydroxyphenyl)benzothiazole (B<sub>1</sub>)

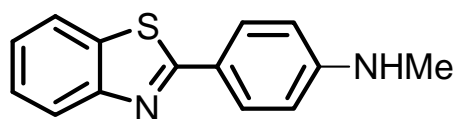

2-(4-methylamino-phenyl)benzothiazole (B<sub>2</sub>)

**Figure S1.** Structure of non-radiolabeled compounds used for blocking studies.

## II. A $\beta$ fibril binding assays of blocking agents B<sub>1</sub> and B<sub>2</sub>

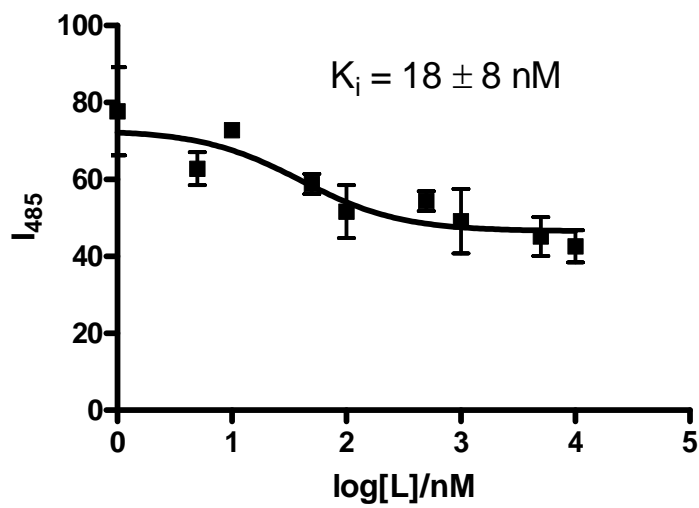

**Figure S2.** ThT competition assay of B<sub>1</sub> with A $\beta$ <sub>40</sub> fibrils ( $[A\beta] = 2 \mu\text{M}$ ,  $[\text{ThT}] = 1 \mu\text{M}$ ).

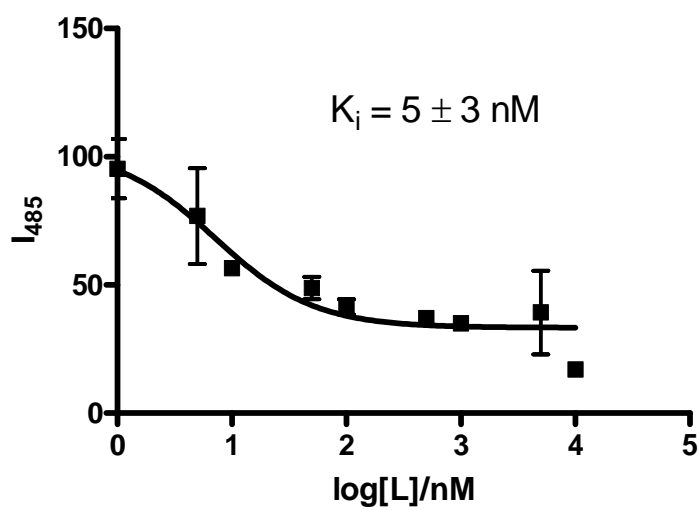

**Figure S3.** ThT competition assay of B<sub>2</sub> with A $\beta$ <sub>40</sub> fibrils ( $[A\beta] = 2 \mu\text{M}$ ,  $[\text{ThT}] = 1 \mu\text{M}$ ).

### III. A $\beta$ fibril binding assays of BFCs L<sub>1</sub>-L<sub>5</sub>

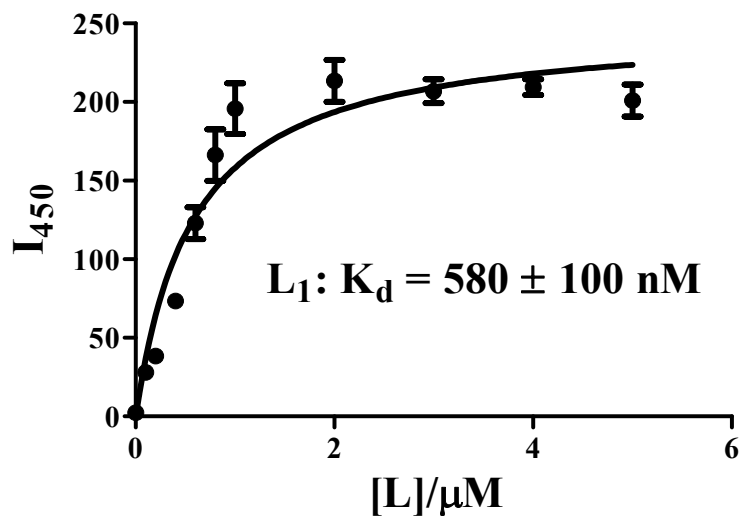

**Figure S4.** Direct binding fluorescence assay of L<sub>1</sub> with A $\beta$ <sub>40</sub> fibrils ( $[A\beta] = 5 \mu\text{M}$ ).

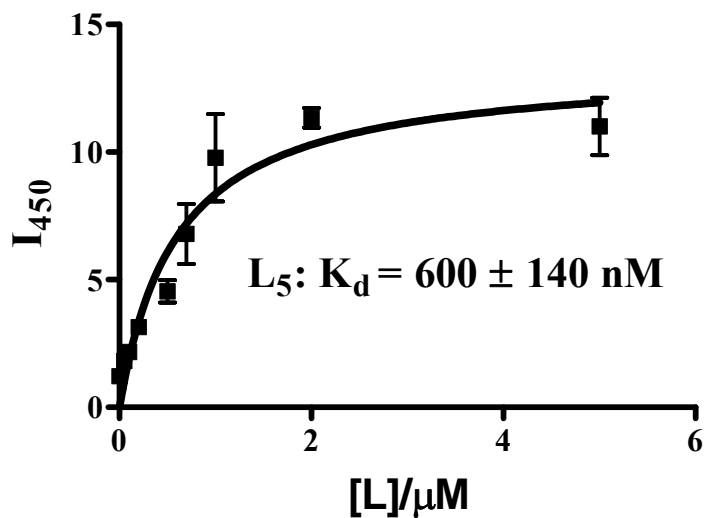

**Figure S5.** Direct binding fluorescence assay of L<sub>5</sub> with A $\beta$ <sub>40</sub> fibrils ( $[A\beta] = 5 \mu\text{M}$ ).

#### IV. A $\beta$ fibril binding assays of Cu complexes of BFCs L<sub>1</sub>-L<sub>5</sub>

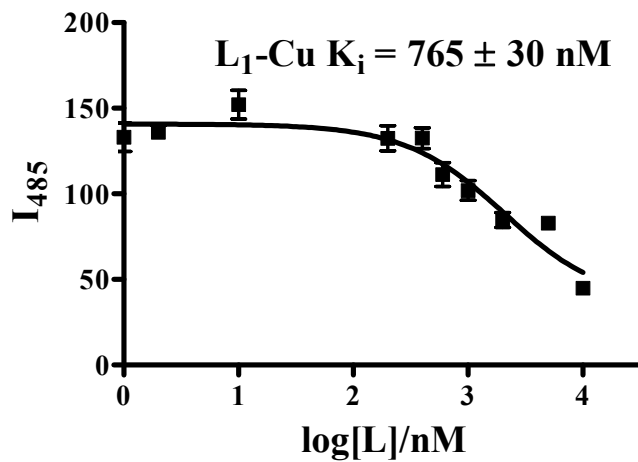

**Figure S6.** ThT competition assay of L<sub>1</sub>-Cu with ThT-bound A $\beta$ <sub>40</sub> fibrils ( $[A\beta] = 2 \mu\text{M}$ ,  $[\text{ThT}] = 1 \mu\text{M}$ ).

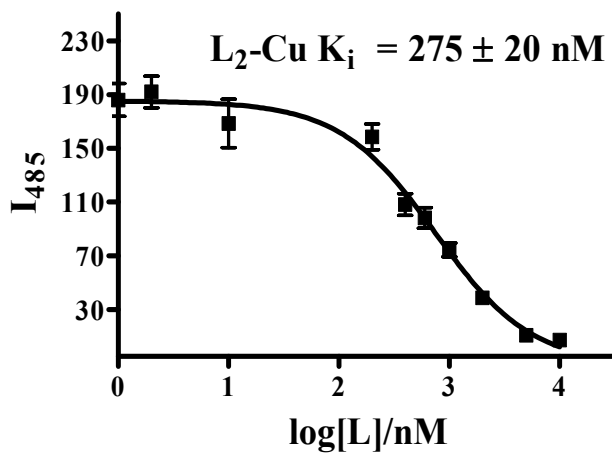

**Figure S7.** ThT competition assay of L<sub>2</sub>-Cu with ThT-bound A $\beta$ <sub>40</sub> fibrils ( $[A\beta] = 2 \mu\text{M}$ ,  $[\text{ThT}] = 1 \mu\text{M}$ ).

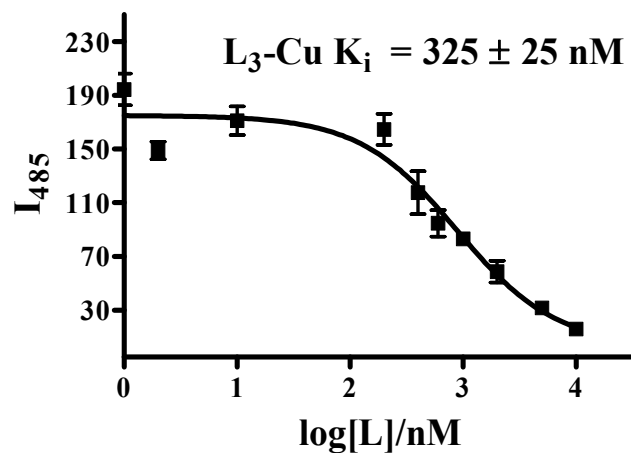

**Figure S8.** ThT competition assay of L<sub>3</sub>-Cu with ThT-bound A $\beta$ <sub>40</sub> fibrils ([A $\beta$ ] = 2  $\mu\text{M}$ , [ThT] = 1  $\mu\text{M}$ ).

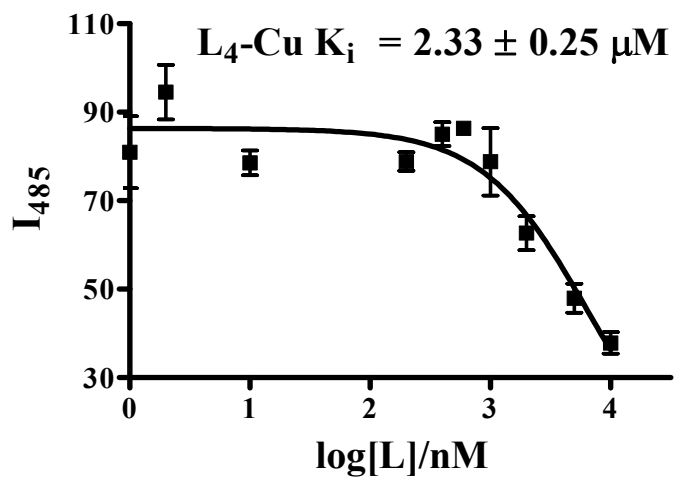

**Figure S9.** ThT competition assay of L<sub>4</sub>-Cu with ThT-bound A $\beta$ <sub>40</sub> fibrils ([A $\beta$ ] = 2  $\mu\text{M}$ , [ThT] = 1  $\mu\text{M}$ ).

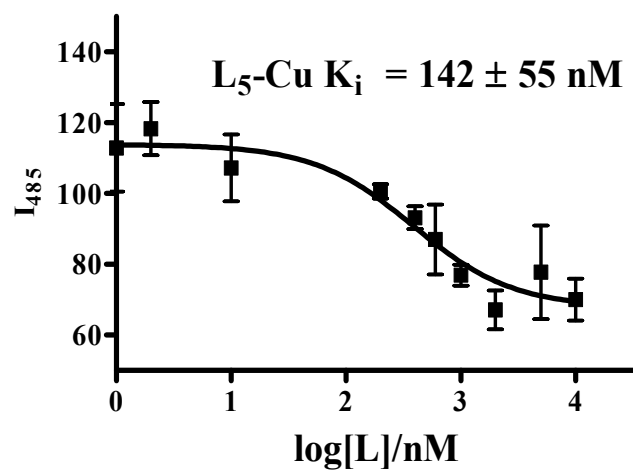

**Figure S10.** ThT competition assay of  $L_5\text{-Cu}$  with ThT-bound  $A\beta_{40}$  fibrils ( $[A\beta] = 2 \mu\text{M}$ ,  $[\text{ThT}] = 1 \mu\text{M}$ ).

## V. Fluorescence microscopy images of mouse brain sections stained with BFCs L<sub>4</sub> and L<sub>5</sub>

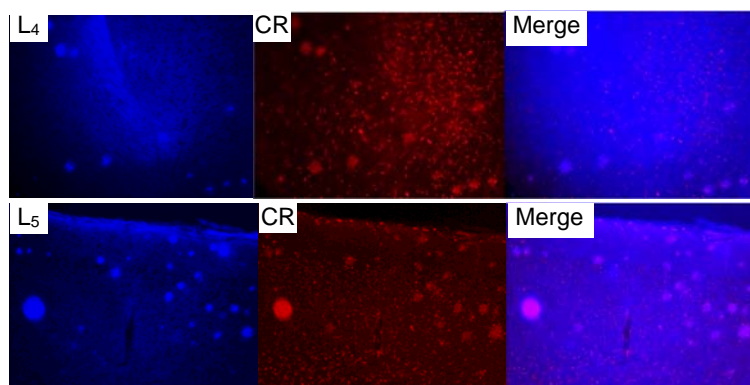

**Figure S11.** Fluorescence microscopy images of Tg2576 brain sections incubated with compounds L<sub>4</sub> and L<sub>5</sub> (left panels), Congo Red (middle panels), and merged images (right panels).



## VI. HPLC traces from $^{64}\text{Cu}$ radiolabeling of BFCs L<sub>0</sub>-L<sub>5</sub>

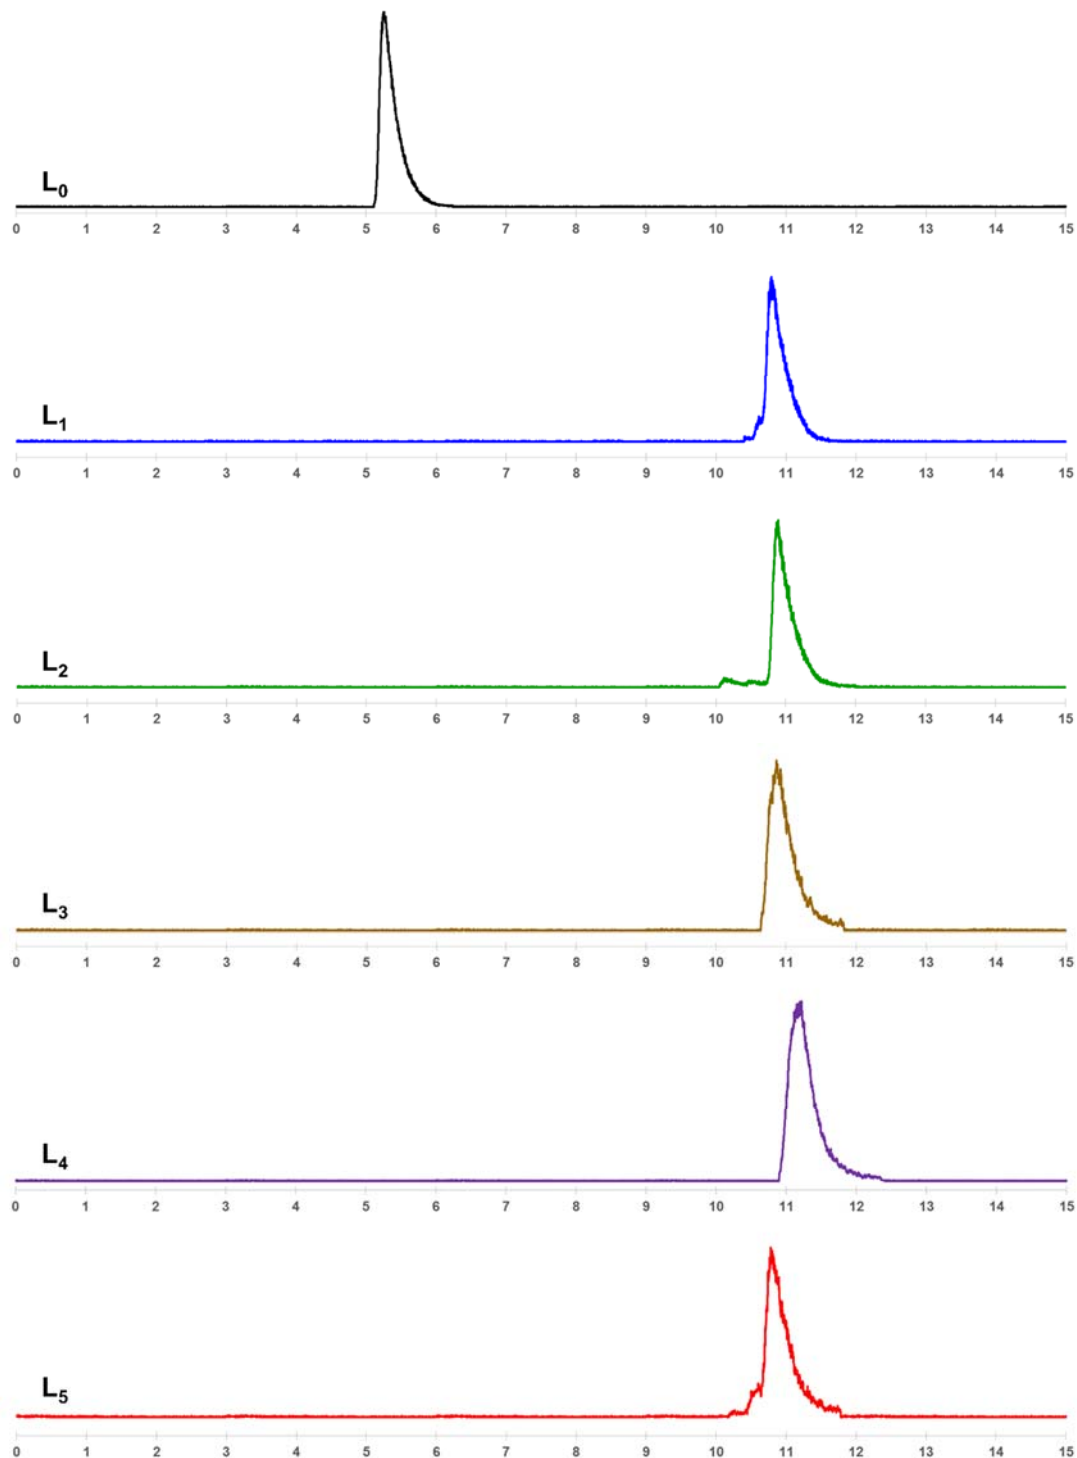

**Figure S12.** HPLC traces from radiolabeling. Retention times were observed as 5.3, 10.8, 10.9, 10.9, 11.2, and 10.8 minutes, respectively, for the  $^{64}\text{Cu}$ -labeled L<sub>0</sub>-L<sub>5</sub> complexes, suggesting quantitative radiolabeling. If present, free  $^{64}\text{Cu}$  would appear at 2.5 min.

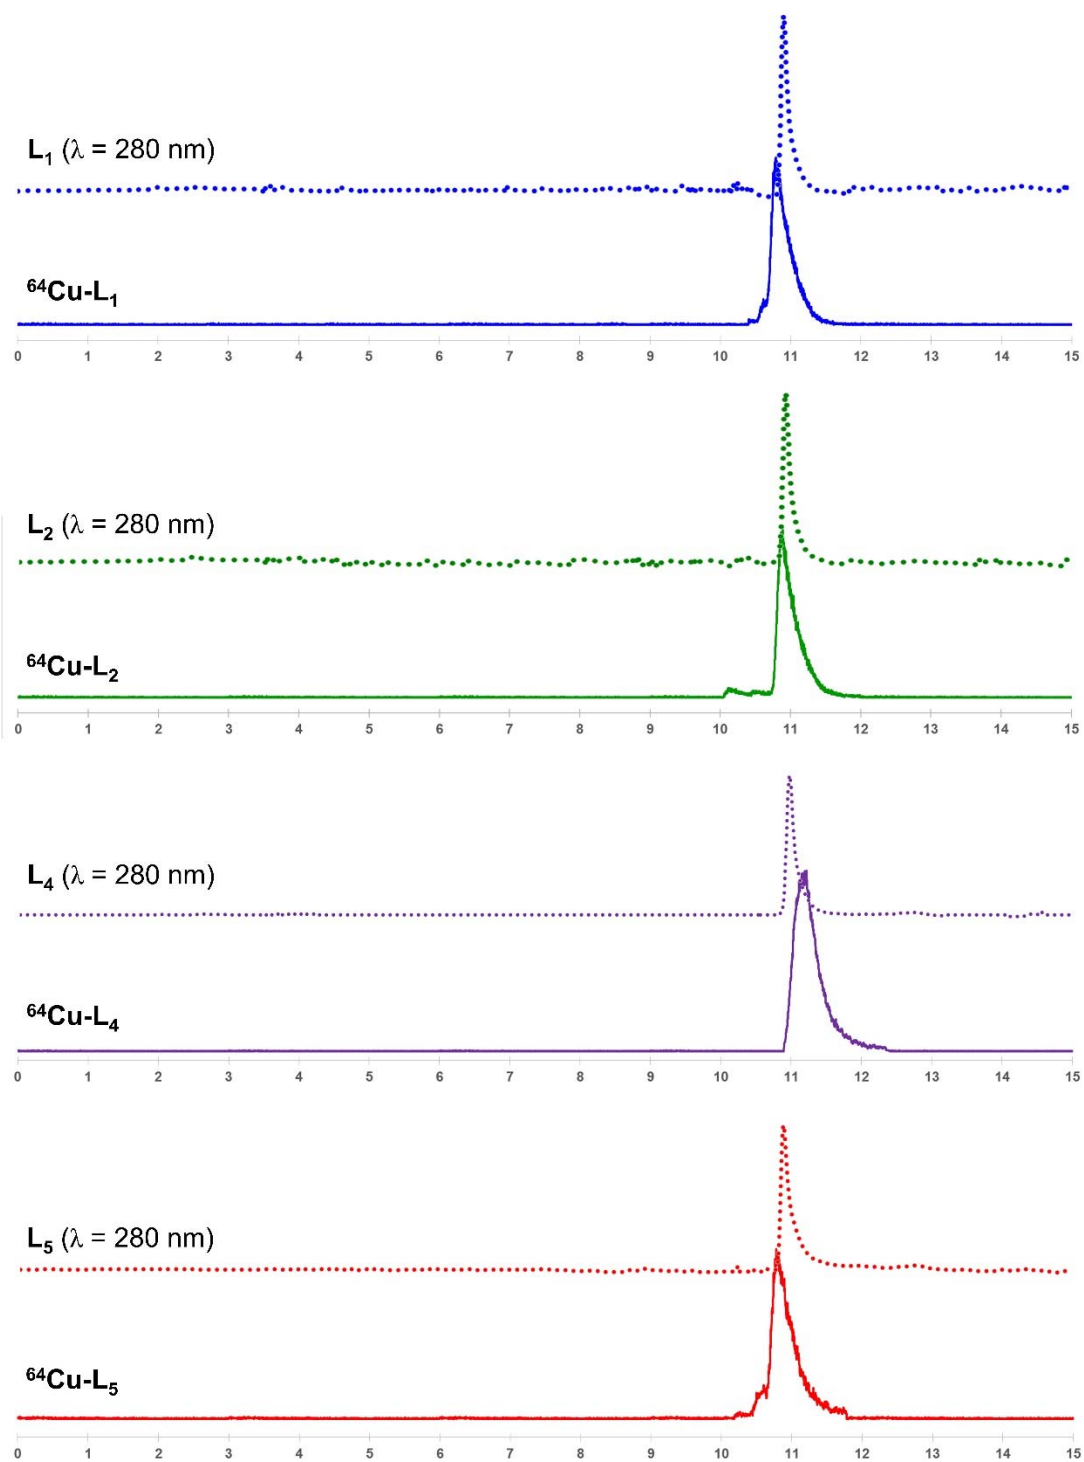

**Figure S13.** Representative overlays of the HPLC UV-vis traces (280 nm) and radiotraces, confirming that the radioactivity corresponds to <sup>64</sup>Cu-labeled BFC complexes.

## VII. Fused PET/CT Scans

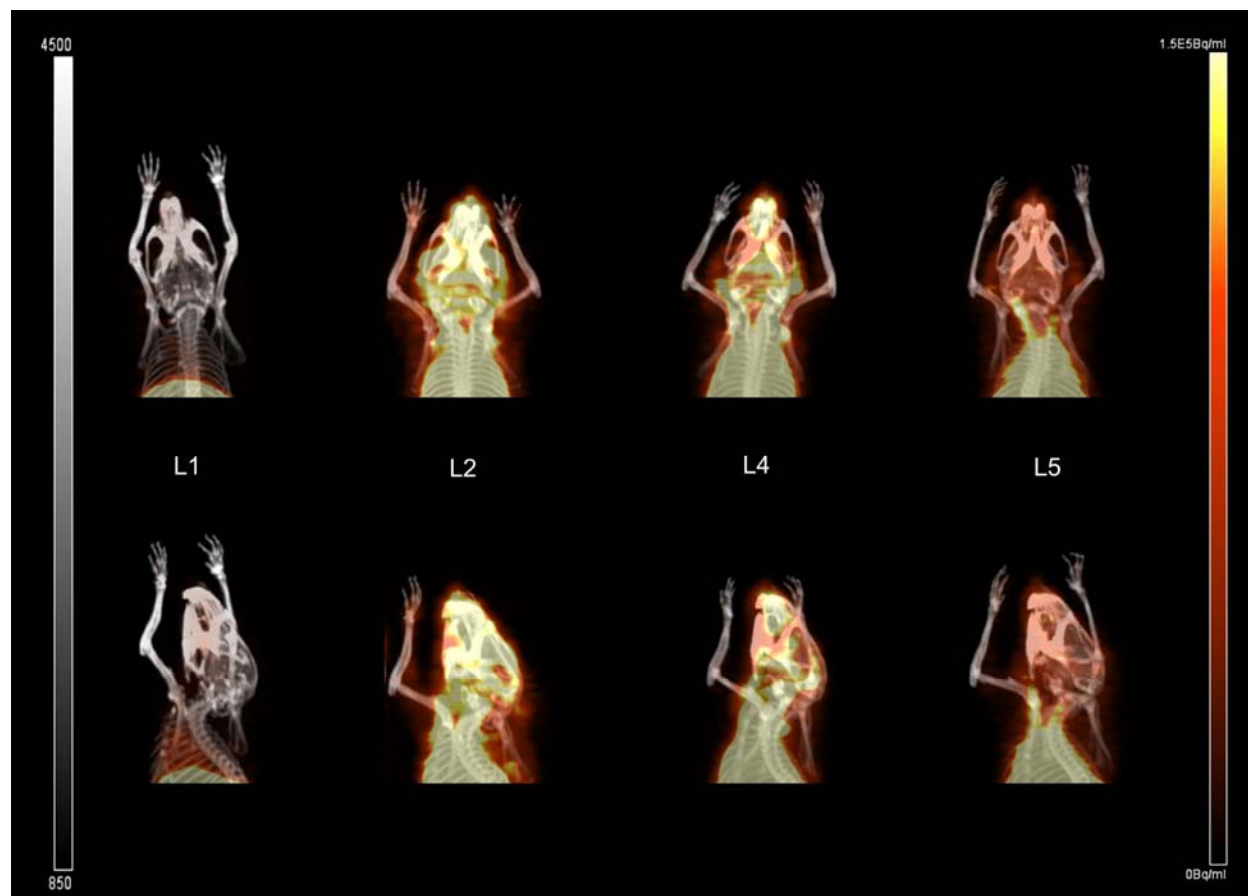

**Figure S14.** Representative fused PET/CT scans showing on the same scale the maximum intensity projections for  $^{64}\text{Cu}$ -radiolabeled ligands L<sub>1</sub>, L<sub>2</sub>, L<sub>4</sub>, and L<sub>5</sub> in Tg2576 transgenic mice.
